1 **A strain-specific multiplex RT-PCR for Australian rabbit haemorrhagic disease viruses**  
2 **uncovers a new recombinant virus variant in rabbits and hares**

3

4 A strain-specific multiplex RT-PCR for Australian lagoviruses

5

6 Robyn N Hall<sup>†1,2</sup>, Jackie E. Mahar<sup>†1,3</sup>, Andrew J. Read<sup>4</sup>, R Mourant<sup>1</sup>, M Piper<sup>1</sup>, N Huang<sup>1</sup> and

7 Tanja Strive<sup>1,2\*</sup>

8

9 <sup>1</sup>CSIRO, Acton, ACT, 2601, Australia

10 <sup>2</sup>Invasive Animals Cooperative Research Centre, University of Canberra, Bruce, ACT, 2601,

11 Australia

12 <sup>3</sup>The University of Sydney, Sydney, NSW, 2006, Australia.

13 <sup>4</sup>Elizabeth Macarthur Agricultural Institute, Menangle, NSW, 2568, Australia

14 <sup>†</sup>These first authors contributed equally to this article.

15 \*Author for correspondence: [Tanja.Strive@csiro.au](mailto:Tanja.Strive@csiro.au)

16

17 **Summary**

18 *Rabbit haemorrhagic disease virus* (RHDV, or GI.1), is a calicivirus in the genus *Lagovirus*

19 that has been widely utilised in Australia as a biological control agent for the management of

20 overabundant wild European rabbit (*Oryctolagus cuniculus*) populations since 1996.

21 Recently, two exotic incursions of pathogenic lagoviruses have been reported in Australia;

22 GI.1a-Aus, previously called RHDVa-Aus, is a GI.1a virus detected in January 2014, and the

23 novel lagovirus GI.2 (previously known as RHDV2). Furthermore, an additional GI.1a strain,

24 GI.1a-K5 (also known as 08Q712), was released nationwide in March 2017 as a

25 supplementary tool for wild rabbit management. To discriminate between these lagoviruses,  
26 a highly sensitive strain-specific multiplex RT-PCR assay was developed, which allows fast,  
27 cost-effective, and sensitive detection of the four pathogenic lagoviruses currently known to  
28 be circulating in Australia. In addition, we developed a universal qRT-PCR assay to be used  
29 in conjunction with the multiplex assay that broadly detects all four viruses and facilitates  
30 quantification of viral RNA load in samples. These assays enable rapid detection,  
31 identification, and quantification of pathogenic lagoviruses in the Australian context. Using  
32 these assays, a novel recombinant lagovirus was detected in rabbit tissues samples, which  
33 contained the non-structural genes of GI.1a-Aus and the structural genes of GI.2. This  
34 variant was also recovered from the liver of a European brown hare (*Lepus europaeus*). The  
35 impact of this novel recombinant on Australian wild lagomorph populations and its  
36 competitiveness in relation to circulating field strains, particularly GI.2, requires further  
37 studies.

38

### 39 **Keywords**

40 Caliciviridae; Lagovirus; Polymerase Chain Reaction; Hemorrhagic Disease Virus, Rabbit;  
41 Recombination, Genetic.

42

### 43 **Introduction**

44 Rabbit haemorrhagic disease (RHD) is caused by pathogenic rabbit caliciviruses  
45 belonging to the genus *Lagovirus*. RHD affects European rabbits of the genus *Oryctolagus*  
46 and is characterised by a necrotising hepatitis leading to multi-organ failure and death,  
47 frequently within 48-72 hours post-infection (Abrantes *et al.*, 2012). RHD was first reported in  
48 China in 1984 and was later recognised as being caused by the rabbit calicivirus GI.1  
49 (previously referred to as *Rabbit haemorrhagic disease virus* or RHDV) (Liu *et al.*, 1984,  
50 Ohlinger *et al.*, 1990, Le Pendu *et al.*, 2017). Subsequently, in the late 1990s, GI.1 variants

51 were reported that had unique reactivity profiles with monoclonal antibodies and were  
52 genetically divergent from previously sequenced GI.1 viruses (Capucci *et al.*, 1998,  
53 Schirrmeyer *et al.*, 1999, Le Gall-Recule *et al.*, 2003). These antigenically distinct variants  
54 were designated GI.1a (previously referred to as subtype RHDVa or genogroup G6), while  
55 classical GI.1 viruses were sub-classified into GI.1b, GI.1c, and GI.1d variants based on  
56 phylogenetic analyses (previously called genogroups G1-G5) (Capucci *et al.*, 1998, Le Gall-  
57 Recule *et al.*, 2003, Lavazza and Capucci, 2016). In 2010, a novel lagovirus, GI.2  
58 (previously called RHDV2), was reported in Europe (Le Gall-Recule *et al.*, 2011a, Dalton *et*  
59 *al.*, 2012). Although this virus also caused RHD, it was both antigenically and genetically  
60 divergent from both GI.1 and GI.1a viruses (Dalton *et al.*, 2012, Le Gall-Recule *et al.*, 2013,  
61 Lavazza and Capucci, 2016). GI.2 is able to cause disease in rabbits vaccinated against  
62 GI.1 and also affects young rabbit kittens, which are normally highly resistant to RHD caused  
63 by GI.1 or GI.1a (Le Gall-Recule *et al.*, 2013).

64 In addition to the pathogenic lagoviruses GI.1, GI.1a, and GI.2, several non-pathogenic  
65 rabbit caliciviruses (RCVs) have been described from various geographical localities,  
66 including Italy (unclassified), Ireland and France (GI.3), and Australia (GI.4) (Capucci *et al.*,  
67 1996, Forrester *et al.*, 2007, Strive *et al.*, 2009, Le Gall-Recule *et al.*, 2011b, Le Pendu *et al.*,  
68 2017). RCVs mainly cause a benign subclinical infection of the small intestine, in contrast to  
69 the pathogenic lagoviruses, which are generally hepatotropic (Capucci *et al.*, 1996, Hoehn *et*  
70 *al.*, 2013).

71 All lagoviruses have a single-stranded, positive-sense RNA genome of approximately  
72 7.5 kb, and share a similar genome structure comprising two open reading frames (ORFs).  
73 ORF1 encodes a single polyprotein, which is cleaved into seven non-structural proteins and  
74 the major capsid protein VP60, while ORF2 encodes a minor structural protein, VP10 (Figure  
75 1). The genome is polyadenylated at the 3' end, and linked to a viral protein, VPg, at the 5'  
76 end (Meyers *et al.*, 1991). Additionally, these viruses produce a subgenomic RNA of  
77 approximately 2.2 kb that is also VPg-linked and polyadenylated (Meyers *et al.*, 1991). This

78 subgenomic RNA encodes both structural genes and is collinear with the 3' end of the  
79 genomic RNA (Figure 1). This facilitates homologous recombination between the genomic  
80 and subgenomic RNAs, which frequently occurs at the junction between the non-structural  
81 and structural genes (i.e. at the RNA-dependent RNA polymerase (RdRp)-VP60 junction)  
82 (Meyers *et al.*, 1991). Recombination appears to play an important role in generating  
83 genetic diversity in viruses of the *Caliciviridae* family, including the lagoviruses (Bull *et al.*,  
84 2007, Lopes *et al.*, 2015). GI.1 recombinants have previously been reported (Forrester *et al.*,  
85 2008), and two GI.2 recombinants have been identified to date, a GI.1bP/GI.2 and  
86 GI.4P/GI.2 virus (Lopes *et al.*, 2015), where the P denotes the RdRp genotype.

87 In Australia, GI.1 viruses are widely utilised as biological control agents for the  
88 management of wild European rabbits, which are a major invasive agricultural and  
89 environmental pest (Cooke and Fenner, 2002). A Czechoslovakian GI.1c strain (CAPM V-  
90 351) was first released for biocontrol purposes in the mid-1990s and this strain has been  
91 regularly re-released across Australia since this time (Cooke and Fenner, 2002, Kovaliski *et*  
92 *al.*, 2014). Until 2014, the only lagoviruses known to be circulating in Australia were the  
93 benign *Rabbit calicivirus Australia-1* (RCV-A1; GI.4) and GI.1c field strains derived from the  
94 originally released GI.1c CAPM V-351 (Kovaliski *et al.*, 2014, Eden *et al.*, 2015, Mahar *et al.*,  
95 2016). However, in January 2014 an exotic GI.1a virus, GI.1a-Aus, was detected from an  
96 RHD outbreak in domestic rabbits in northern Sydney, New South Wales (NSW) (OIE,  
97 2014). This virus subsequently caused multiple RHD outbreaks in NSW and the Australian  
98 Capital Territory (ACT) in both domestic and wild rabbits (RHDVa paper, in review). Full  
99 genome sequencing of GI.1a-Aus indicated that this was a recombinant virus, with a capsid  
100 gene most closely related to a 2010 GI.1a strain from China and non-structural genes similar  
101 to GI.4-like viruses (RHDVa paper, in review). Subsequently in May 2015, a second  
102 lagovirus incursion, GI.2, was detected in the ACT. This was also a recombinant virus (GI.2  
103 capsid, GI.1b non-structural genes) that is closely related to viruses that circulated in  
104 Portugal and the Azores in 2014 (Hall *et al.*, 2015). In addition, a Korean GI.1a strain, GI.1a-

105 K5 (also known as 08Q712), was released nationwide in March 2017, to improve rabbit  
106 biocontrol program (Oem *et al.*, 2009, Cox *et al.*, 2013, OIE, 2017).

107 With the growing repertoire of lagoviruses now present in Australia, improved  
108 diagnostic tools are needed to enable rapid discrimination between the different viruses  
109 causing RHD and sudden death in both wild and domestic rabbits. Monitoring the spread  
110 and interactions of these viruses will help to maximise the effectiveness of wild rabbit control  
111 programs, and to guide the implementation of control measures for domestic rabbits. Here  
112 we report a sensitive and specific multiplex RT-PCR assay for the discrimination of the  
113 pathogenic lagoviruses circulating in Australia, namely classical GI.1c viruses, GI.1a-Aus,  
114 GI.1a-K5, and GI.2. Using this assay, we detected a new recombinant variant that has arisen  
115 from recombination between GI.1a-Aus and GI.2. Additionally, we describe a SYBR-green  
116 based qRT-PCR for the generic detection of all rabbit lagoviruses (GI.1c, GI.1a, GI.2, GI.4)  
117 circulating in Australia in a single PCR reaction. This assay facilitates quantification of viral  
118 RNA load in diagnostic samples from deceased animals, which is useful when interpreting  
119 equivocal results, since rabbits succumbing to fulminant RHD invariably have high viral loads  
120 in tissues (Elsworth *et al.*, 2014), while low viral loads are likely to reflect sample  
121 contamination or residual vaccine virus. Taken together, the two assays allow robust and  
122 cost-effective sample analysis with a rapid turnaround time.

123

## 124 **Materials and Methods**

### 125 **Virus samples**

126 For multiplex RT-PCR assay development and validation, we used liver samples that  
127 had previously tested positive for different lagoviruses at the Elizabeth Macarthur Agricultural  
128 Institute (EMAI), Menangle, NSW. These samples had originally been collected from rabbits  
129 suspected to have died from RHD. Initial virus typing at EMAI was conducted using  
130 individual qRT-PCR assays specific for GI.1, GI.2, and GI.1a-Aus (Gall *et al.*, 2007, Lavazza

131 and Capucci, 2016) (RHDVa paper, in review). GI.1a-K5 was obtained from EMAI from  
132 stocks of the virus approved by Australian authorities for nationwide release. Liver samples  
133 and GI.1a-K5 stock virus were shipped to the Commonwealth Scientific and Industrial  
134 Research Organisation (CSIRO) on ice and stored at -20 °C on arrival.

135 For validation of the lagovirus qRT-PCR assay, in addition to the known lagovirus-  
136 positive samples from EMAI, liver or bone marrow samples from wild or domestic rabbits and  
137 hares that had died of unknown causes were also analysed. These samples were submitted  
138 to CSIRO for lagovirus testing either frozen or stored in an RNA stabilization solution  
139 containing 10 mM EDTA, 12.5 mM sodium citrate, and 2.65 M ammonium sulfate pH 5.2.  
140 Additional samples from healthy rabbits and hares were obtained from shot samples  
141 collected as part of routine vertebrate pest control program and lagovirus serological  
142 surveillance studies. Serological surveillance studies were conducted in the ACT and in  
143 Victoria. Animals were shot from a vehicle using a 0.22 calibre rifle targeting the head or  
144 chest. Sera and tissue samples (liver, duodenum, and bile) were collected post-mortem.  
145 Collection of GI.4-positive samples was described previously (Mahar *et al.*, 2016). All work  
146 involving live animals (domestic and wild) was carried out according to the Australian Code  
147 for the Care and Use of Animals for Scientific Purposes with approval from the institutional  
148 animal ethics committee (CWLA-AEC #2016-02, #DOMRAB, ESAEC #13-10, ESAEC #10-  
149 12).

150 For detection of GI.1a-AusP/GI.2 recombinant viruses, we screened archival rabbit  
151 tissue samples and new samples that were submitted to CSIRO for lagovirus testing. These  
152 were predominantly liver samples but included two bone marrow samples, one muscle  
153 sample, and one kidney sample.

#### 154 **Negative control samples**

155 Negative control liver samples were obtained from known lagovirus-free domestic New  
156 Zealand White rabbits. Domestic rabbits were reared following the Australian Code for the  
157 Care and Use of Animals for Scientific Purposes, and all procedures were approved by the

158 institutional animal ethics committee (CESAEC #DOMRAB). Does were not vaccinated  
159 against GI.1 and the colony is routinely monitored and confirmed to be free of GI.4 (Liu *et al.*,  
160 2012a, Liu *et al.*, 2012b).

### 161 **RNA isolation**

162 RNA was extracted from 20-30 mg of tissue or 50 µl of GI.1a-K5 stock virus using  
163 either the RNeasy mini kit (Qiagen, Chadstone Centre, VIC), the Maxwell 16 LEV  
164 simplyRNA tissue kit (Promega, Alexandria, NSW), or the Purelink viral RNA/DNA mini kit  
165 (Life Technologies, Scoresby, VIC) as per manufacturers' instructions.

### 166 **Multiplex RT-PCR primer design**

167 Primers were designed to specifically amplify fragments of either GI.1c, GI.1a-Aus,  
168 GI.1a-K5, or GI.2. Each primer pair was designed to produce an amplicon of a unique size  
169 that could be easily discriminated by agarose gel electrophoresis. Amplicon location, primer  
170 sequences, and nucleotide positions (based on Genbank accession KT280060) are shown  
171 in Table 1 and Figure 1. Additionally, rabbit specific primers targeting the *Oryctolagus*  
172 *cuniculus* 12S mitochondrial rRNA gene were included in the assay to confirm that RNA  
173 isolation was successful (Martín *et al.*, 2009).

### 174 **Multiplex RT-PCR development and validation**

175 Multiplex RT-PCR was optimised using high titre RNA ( $6 \times 10^7$  to  $2 \times 10^9$  copies/µl) of  
176 representative GI.1c, GI.1a-Aus, GI.1a-K5, and GI.2 viruses. All reactions were performed  
177 using the OneStep Ahead RT-PCR kit (Qiagen, Chadstone Centre, VIC). Each 10µl reaction  
178 contained 1× OneStep Ahead RT-Mix, 1× OneStep Ahead RT-PCR Master Mix, 0.5 µM  
179 each primer, and 1 µl of template RNA diluted 1/10 in nuclease free water. A 'no template  
180 control' and uninfected rabbit liver RNA control were included in each run. Cycling was  
181 performed using either an Eppendorf AG22331 or Applied Biosystems Proflex PCR system  
182 thermocycler, with reverse transcription being conducted at 50 °C for 10 min, followed by  
183 initial denaturation at 95 °C for 5 min, and then 40 cycles of 95 °C for 10 s, 63 °C for 20 s, 72

184 °C for 10 s, with a final extension at 72 °C for 2 min. The annealing temperature was  
185 optimised by gradient PCR during initial assay optimisation. Products were electrophoresed  
186 on 2% agarose gels (Bio-Rad Laboratories, Gladesville, NSW) in 1x tris-acetate EDTA, and  
187 products were visualised using SYBRsafe DNA gel stain (Life Technologies, Scoresby, VIC)  
188 on an Alpha Innotech FluorChem 8800 imaging system (Alpha Innotech, San Leandro, CA).

189 The specificity of the multiplex RT-PCR assay was tested using 79 known-positive  
190 tissue samples for which the virus strain had previously been determined at the EMAI  
191 veterinary virology diagnostic laboratory. The 79 samples included GI.1c (n=6), GI.1a-Aus  
192 (n=21), GI.1a-K5 (n=1), and GI.2 (n=51) viruses. Additionally, 12 domestic rabbit liver  
193 samples known to be negative for lagoviruses were screened.

194 Sensitivity was determined by diluting a representative GI.1c, GI.1a-Aus, and GI.2  
195 virus to  $1 \times 10^8$  capsid copies per  $\mu\text{l}$ , and GI.1a-K5 to  $1 \times 10^6$  capsid copies per  $\mu\text{l}$ , after  
196 quantification by qRT-PCR, and preparing a 10-fold dilution series of these viruses to  $1 \times 10^1$   
197 capsid copies per  $\mu\text{l}$ . Each dilution series was confirmed with qRT-PCR to ensure  
198 quantification was correct.

### 199 **qRT-PCR primer design**

200 Primers were designed to amplify a region of VP60 that is conserved in all four  
201 pathogenic GI lagoviruses present in Australia. Primer sequences and nucleotide positions  
202 (based on Genbank accession KT280060) are shown in Table 2.

### 203 **Standards for quantification of GI lagoviruses using qRT-PCR**

204 Full-length GI.1 genomic standards for absolute quantification of viral loads were  
205 generated by *in vitro* transcription. A plasmid construct containing the full-length GI.1c CAPM  
206 V-351 genome under control of an Sp6 promoter (Urakova *et al.*, 2015) was digested with  
207 NotI-HF (Genesearch, Arundel, QLD) for 6 hours at 37°C. Digested DNA was precipitated  
208 with EDTA and sodium acetate, pH 5.5, using standard methods. DNA was quantified using  
209 the Qubit dsDNA BR assay (Life Technologies, Scoresby, VIC) and *in vitro* transcripts were



210 prepared from 1 µg of digested DNA using the Riboprobe Combination System-SP6/T7 RNA  
211 Polymerase (Promega, Alexandria, NSW) as per manufacturer's instructions. Transcripts  
212 were purified using the RNeasy mini kit (Qiagen, Chadstone Centre, VIC) with on-column  
213 DNase digestion, as per manufacturer's directions. Transcripts were quantified using a  
214 NanoDrop spectrophotometer in duplicate and assessed for quality by agarose gel  
215 electrophoresis. Transcript copy number per µl of stock was determined using the following  
216 equation, where 340 g/mol was assigned as the average weight of a ribonucleotide:

$$220 \quad \frac{\text{RNA concentration} \left( \frac{\text{g}}{\mu\text{l}} \right) \times 6.022 \times 10^{23} \text{ mol}^{-1}}{(\text{length} \times 340 \text{ g/mol})}$$

217 Transcript stocks were diluted to  $1 \times 10^{10}$  copies/µl and stored at -80 °C. Absolute  
218 quantification was performed by preparing 10-fold serial dilutions of transcripts in nuclease-  
219 free water containing 125 ng of yeast tRNA (Life Technologies, Scoresby, VIC).

## 221 **qRT-PCR optimisation**

222 Quantitative real-time RT-PCR conditions were optimised with Gl.1c *in vitro*  
223 transcripts. Reactions were performed in a final volume of 10µl and contained 1x SensiFAST  
224 SYBR No-ROX One-Step mix (Bioline, Alexandria, NSW), 0.5 µM of each primer, 0.2 µl of  
225 RNase inhibitor, 0.1 µl of reverse transcriptase, and 1 µl of template RNA. Cycling was  
226 performed using a CFX96 C1000 real-time PCR detection system (Bio-Rad Laboratories,  
227 Gladesville, NSW), with reverse transcription conducted at 45 °C for 10 min, followed by  
228 denaturation at 95 °C for 5 min, and then 40 cycles of 95 °C for 10 s, 63 °C for 40 s, 78 °C  
229 for 10 s with data acquisition. Melt curve analysis was conducted at 65-95 °C in 0.5 °C  
230 increments at 5 s per increment. Annealing temperature was optimised by gradient PCR.  
231 Data were analysed using CFX manager 3.1 software (Bio-Rad Laboratories, Gladesville,  
232 NSW) using a baseline threshold of 200 and baseline subtracted curve fit setting. Average  
233 assay efficiency was 95%. Amplicons were separated on 2% agarose gels and visualised by  
234 staining with SYBRsafe DNA gel stain (Life Technologies, Scoresby, VIC) to verify that  
235 products were of the expected size.

236 **qRT-PCR validation**

237 Reactions were performed in duplicate and each run included a dilution series of full-  
238 length GI.1c transcript standards ranging from  $1 \times 10^8$  copies/ $\mu$ l to  $1 \times 10^2$  copies/ $\mu$ l for  
239 quantification, a 'no template control' to detect contamination, and a positive control (stored  
240 in single use aliquots) to control for inter-assay variation. Wells with melt curve peaks below  
241 80 °C were excluded since these peaks represented primer dimer formation. Samples were  
242 excluded from analysis and repeated if the threshold cycle (Cq) standard deviation was >0.5,  
243 and runs were repeated if the positive control Cq deviated by more than 0.5 from the back-  
244 calculated average of this sample.

245 The qRT-PCR assay was validated initially using the 79 known lagovirus-positive  
246 tissue samples as previously determined at EMAI, including GI.1c (n=6), GI.1a-Aus (n=21),  
247 GI.1a-K5 (n=1), and GI.2 (n=51) viruses, and 12 known-negative domestic rabbit liver  
248 samples. Subsequently, additional GI.1c (n=20) and GI.2 (n=99) positive samples, as  
249 determined by the multiplex RT-PCR assay, and healthy shot rabbit or hare liver samples  
250 (n=50) were screened.

251 **Confirmation of a novel GI.1a-AusP/GI.2 recombinant**

252 Sanger sequencing over the RdRp-VP60 junction was conducted to verify putative  
253 recombination in virus samples that were positive for both GI.1a-Aus and GI.2 on multiplex  
254 RT-PCR assay. First-strand cDNA was synthesised from 5  $\mu$ l of RNA using 500 ng of  
255 OligodT(18mer) (GeneWorks, Thebarton, SA) and Invitrogen Superscript III or Superscript IV  
256 (Life Technologies, Scoresby, VIC) according to manufacturers' directions. PCR was  
257 conducted using primers RHDV 11 and RHDV 12-rev (Elsworth *et al.*, 2014) or GI.1a-  
258 Aus\_fwd (Table 1) and GI.2-qRTPCR-R (5'-GTCAAATGTACGCTGGCTGG-3'), as  
259 described previously (Mahar *et al.*, 2016). PCR amplicons were submitted to the ACRF  
260 Biomolecular Resource Facility (Canberra, ACT) for Sanger sequencing, and sequences  
261 have been deposited in Genbank under accession numbers MF598303 to MF598338.  
262 Sequences were aligned with a representative GI.1a-Aus genome (Genbank ref KY628309)

263 and an Australian GI.2 genome (Genbank accession KT280060) using MAFFT as  
264 implemented in Geneious v9.1.6 (Kearse *et al.*, 2012).

### 265 **Full genome sequencing of the novel GI.1a-AusP/GI.2 recombinant**

266 The complete genomes of GI.1a-K5 and a suspected GI.1a-AusP/GI.2 recombinant,  
267 Car-3, were amplified in overlapping fragments and DNA libraries were prepared and  
268 sequenced using Illumina Miseq technology as described previously (Eden *et al.*, 2015,  
269 Mahar *et al.*, 2016, Hall *et al.*, 2017). Sequences were deposited in Genbank under  
270 accession numbers MF598301 and MF598302, respectively. GI.1a-K5 was amplified using  
271 the primer pairs RHDV-1/RHDVR 6-rev; RHDV 7/RHDVR 10-rev; and RHDV 11/RHDV\_end,  
272 while Car-3 was amplified using the primer pairs RHDV-1/RHDVR 6-rev; RCVf1.5/RCVr3.3;  
273 RCVf3.0/RCVr4.7; RHDV 11/RHDVR 12-rev; and RHDV f2/RHDV\_end (Elsworth *et al.*,  
274 2014, Mahar *et al.*, 2016, Hall *et al.*, 2017). Consensus sequences were constructed by  
275 mapping cleaned reads to the lagovirus GI reference sequence (Genbank accession  
276 M67473.1 DEU/FRG/1988.50) using the Geneious package v8.1.5 (Kearse *et al.*, 2012).

### 277 **Phylogenetic and recombination analyses**

278 To explore evidence of recombination in Car-3, the complete genome sequence was  
279 aligned with 30 representative lagovirus sequences obtained from Genbank  
280 (<http://www.ncbi.nlm.nih.gov/GenBank/index.html>), for phylogenetic and recombination  
281 analyses. The RDP, GENECONV, MaxChai, and Bootscan methods, as available in the  
282 Recombination Detection Program v4 (Martin *et al.*, 2015), were employed for recombination  
283 screening, and significant evidence of recombination was denoted by a p value <0.05. For  
284 phylogenetic analysis, a European brown hare syndrome virus (EBHSV, now referred to as  
285 GII.1) genome sequence (Genbank accession KC832839) was used as an outgroup, and  
286 the alignment was divided into non-structural genes (5,238 nt) and structural genes (2,083  
287 nt). A maximum likelihood phylogeny was inferred for both non-structural and structural gene  
288 datasets using PhyML as available in Geneious v 8.1.5, using the GTR+I substitution model,  
289 with five rate categories, an estimated gamma distribution parameter, and a combination of

290 nearest-neighbour interchange and subtree pruning and regrafting (SPR) branch swapping  
291 topology searching. Branch support was estimated using 1,000 bootstrap replicates and  
292 trees were rooted using the EBHSV sequence.

293

## 294 **Results**

### 295 **Multiplex RT-PCR**

296 A one-step multiplex RT-PCR was designed to diagnose fatal RHD and identify the  
297 causative virus, based on the pathogenic lagoviruses known to be circulating in Australia.  
298 Amplicons for GI.1c, GI.1a-Aus, GI.1a-K5, and GI.2 lagoviruses, along with a rabbit-specific  
299 amplicon to verify successful RNA extraction, could clearly be discriminated by agarose gel  
300 electrophoresis (Figure 2).

301 Sensitivity of the multiplex RT-PCR assay was determined using 10-fold serial dilutions  
302 of representative samples of GI.1c, GI.1a-Aus, GI.1a-K5, and GI.2 viruses after  
303 quantification by qRT-PCR (Figure 3). The assay was able to detect all viruses down to  
304  $1 \times 10^1$  capsid copies per  $\mu\text{l}$  of RNA template under these conditions.

305 The multiplex RT-PCR was validated using 12 rabbit liver samples known to be  
306 lagovirus-negative, and 79 known-positive samples for which virus identification had  
307 previously been performed at an external diagnostic laboratory (EMAI). Overall, 97% (77/79)  
308 of the known-positive samples and 92% (11/12) of known-negative samples were correctly  
309 identified (Table 3). One GI.1c and one GI.2 sample were not detected by the multiplex  
310 assay, however, these samples showed very low virus titres at EMAI (Cq 34 and 33,  
311 respectively). One known-negative sample repeatedly produced a very weak amplicon  
312 approximately the size of the GI.2 product on multiplex RT-PCR assay. However, this  
313 sample was collected in 2011, before GI.2 was present in Australia, confirming that this was  
314 a non-specific amplification product. This weak non-specific product was not observed in  
315 other negative samples. Additionally, one GI.2 sample produced both a GI.2 and GI.1a-Aus

316 band in the multiplex RT-PCR, suggesting either a mixed infection, or a possible  
317 recombinant virus.

318 To test the ability of the multiplex RT-PCR assay to detect mixed infections, seven liver  
319 samples that were positive for both GI.1c and GI.2, as determined at EMAI, were screened.  
320 Although all samples were positive on multiplex RT-PCR, frequently only one amplicon was  
321 present, which corresponded to the dominant variant in the mixed infection based on Cq  
322 values obtained at EMAI (R. Hall, unpublished results).

323

### 324 **Quantitative real-time RT-PCR**

325 A SYBR-green qRT-PCR assay was developed for quantification of virus loads in  
326 diagnostic samples. The assay amplifies an 89 bp region within the VP60 capsid gene that is  
327 conserved in all four pathogenic GI lagoviruses present in Australia. Full-length GI.1c *in vitro*  
328 transcript standards were produced to facilitate absolute quantification of virus loads. The  
329 assay was validated firstly with the 79 known lagovirus-positive RNAs and 12 known-  
330 negative RNAs used for multiplex RT-PCR validation. Of the lagovirus-positive samples,  
331 78/79 were positive on the qRT-PCR assay, with virus loads ranging from  $9 \times 10^1$  to  $4 \times 10^9$   
332 capsid copies per mg of tissue ( $\bar{x}_g = 3 \times 10^8$ ). Only five samples had virus loads less than  
333  $1 \times 10^6$  capsid copies per mg of tissue. Both the sample that was negative on our qRT-PCR  
334 and very weak positive sample ( $9 \times 10^1$  capsid copies per mg of tissue) showed extremely low  
335 virus titres at EMAI (Cq 33 and 34, respectively). In all 12 of the known-negative domestic  
336 rabbit liver samples virus loads were below 10 capsid copies per mg of tissue, outside the  
337 range of the standard curve.

338 Subsequently, further validation was conducted with additional GI.1c (n=20) and GI.2  
339 (n=99) positive samples, as determined by the multiplex RT-PCR assay. All 119 samples  
340 were positive on qRT-PCR. Virus loads in these samples ranged from  $6 \times 10^3$  to  $8 \times 10^9$  capsid  
341 copies per mg of tissue ( $\bar{x}_g = 3 \times 10^8$ ) and only two samples had virus loads less than  $1 \times 10^6$

342 capsid copies per mg of tissue. Liver samples collected from wild shot rabbits and hares  
343 (n=50) were also screened, and virus loads up to  $3 \times 10^3$  capsid copies per mg of tissue ( $\bar{x}_g =$   
344  $4 \times 10^1$ ) were detected in these samples. Although these were presumed healthy shot rabbits  
345 and hares, these samples were not verified to be true negative samples, and it has  
346 previously been reported that lagovirus RNA can frequently be detected from healthy  
347 animals (Forrester *et al.*, 2003). Finally, the qRT-PCR assay was also able to detect GI.4  
348 RNA in duodenal samples, with virus loads ranging from  $3 \times 10^2$  to  $3 \times 10^5$  capsid copies per  
349 mg of duodenal tissue ( $\bar{x}_g = 1 \times 10^4$ ; R. Hall, unpublished data).

350

### 351 **Detection of a novel GI.1a-AusP/GI.2 recombinant**

352 During validation of the multiplex RT-PCR, one sample, collected from NSW in July  
353 2016 and typed as GI.2 at EMAI, produced amplicons for both GI.1a-Aus and GI.2 viruses  
354 (Figure 4). Sanger sequencing of a single amplicon spanning the RdRp-VP60 junction, the  
355 most common recombination breakpoint for caliciviruses (Bull *et al.*, 2007), confirmed the  
356 presence of a recombinant virus, rather than a mixed GI.1a-Aus/GI.2 infection. Screening of  
357 archival samples and newly collected field samples using the multiplex RT-PCR assay and  
358 confirmatory Sanger sequencing detected an additional 35 cases of infection with this novel  
359 recombinant between July 2016 and June 2017, with cases occurring in NSW, the ACT, and  
360 in Victoria (Figure 5, Table 4). Interestingly, one of these recombinant detections was from a  
361 liver sample collected from a European brown hare (*Lepus europaeus*) found dead in NSW.  
362 Additionally, one case occurred in a domestic rabbit that had been vaccinated with Cylap®  
363 RCD vaccine (Zoetis, West Ryde, NSW) approximately four months prior to infection.

364 Subsequently, the full genome of one of these recombinant viruses was sequenced  
365 and recombination and phylogenetic analyses were performed (Figure 6). There was  
366 significant evidence for recombination between the RdRp and VP60 genes detected by all  
367 methods in the Recombination Detection Program, with the specific breakpoint predicted to  
368 occur at nucleotide position 5,297 (equivalent to position 5,306 according to GI reference

369 genome numbering, Genbank accession M67473.1). Phylogenetic analyses demonstrated  
370 that the non-structural genes of the novel recombinant were closely related to GI.1a-Aus  
371 sequences, sharing >98% nucleotide identity in this region, while the structural genes  
372 clustered with Australian GI.2 viruses, sharing 98.5% nucleotide identity with the structural  
373 genes of the prototype Australian GI.2, BIMt-1, with strong bootstrap support (Figure 6).  
374 Based on the newly proposed nomenclature for lagoviruses (Le Pendu *et al.*, 2017), the  
375 GI.1a-Aus non-structural sequences are closely related to, but divergent from, previously  
376 described GI.4a, b, c, and d variants, thus we have designated them as GI.4e. The close  
377 relationship of the novel recombinant with Australian variants of GI.1a and GI.2, suggest that  
378 the recombination event occurred in Australia.

379

## 380 Discussion

381 We have developed a sensitive and specific multiplex RT-PCR for the detection and  
382 discrimination of pathogenic GI lagoviruses present in Australia, namely classical GI.1c,  
383 GI.2, GI.1a-Aus, and GI.1a-K5 viruses (Figure 2). In addition, we describe a SYBR-green  
384 based qRT-PCR assay for quantification of genogroup GI lagovirus loads in diagnostic  
385 samples. We have targeted the VP60 capsid gene in this assay to maximise sensitivity,  
386 since both genomic and subgenomic RNAs will be detected by these primers.

387 During validation of the multiplex RT-PCR assay, no viruses were misidentified as an  
388 incorrect strain, highlighting the specificity of this assay. Although a weak product was  
389 amplified from one known-negative rabbit liver sample, this was clearly distinguishable from  
390 the intense specific bands observed for known-positive samples. No amplification was  
391 detected in the negative sample by qRT-PCR, highlighting the synergism of the two assays.  
392 Mixed GI.1c/GI.2 infections were not reliably detected using the multiplex RT-PCR assay  
393 described here, since only the dominant virus was amplified consistently. However, the  
394 multiplex assay can be run in singleplex format for each virus if the index of suspicion is high  
395 for a mixed infection. It must also be noted that during routine use of the multiplex RT-PCR

396 assay, three samples (out of over 450 positive samples tested to date) were negative on  
397 multiplex RT-PCR that were subsequently shown to have very high viral titres by qRT-PCR.  
398 When the multiplex assay was repeated, on both the initial and repeated RNA extractions,  
399 these samples returned false negative results in up to two of seven replicates. It is unknown  
400 why these templates repeatedly produced false negative results, however, all three samples  
401 were from the same RHD outbreak so sample collection, or handling and storage during  
402 transport, may have been a contributing factor. These false negatives are easily detected  
403 when the multiplex and qRT-PCR assay are used together.

404 The average (geometric mean) viral load in the livers of infected animals, as measured  
405 by our qRT-PCR assay, was  $3 \times 10^8$  capsid copies per mg of tissue. This supports previous  
406 observations that acute RHD is associated with high levels of virus replication in the liver  
407 (Elsworth *et al.*, 2014). Samples with lower viral loads may represent animals that  
408 succumbed to sequelae of viral infection after a prolonged disease, or may simply be due to  
409 sample degradation, since some samples were collected from wild rabbit carcasses that  
410 were located in unfavourable environmental conditions, for example exposed to direct  
411 sunlight for an unknown period of time. Two samples that had previously been identified as  
412 weak positive samples at EMAI were either negative or had a very low virus load ( $9 \times 10^1$   
413 capsid copies per mg of tissue) outside the range of the standard curve in our qRT-PCR  
414 assay. These samples were also negative on multiplex RT-PCR. The discrepancy between  
415 our results and those of the external laboratory may be due to sample degradation during  
416 storage and transport, differences in RNA extraction methods used between the  
417 laboratories, or a higher sensitivity of the Taqman assay used at the external laboratory.  
418 However, the diagnostic significance of these very low titres is questionable given that  
419 animals with terminal RHD invariably have very high viral loads (Elsworth *et al.*, 2014).

420 Interestingly, virus loads up to  $3 \times 10^3$  capsid copies per mg of tissue were detected in  
421 the livers of presumed negative healthy wild rabbits and hares, which were negative on  
422 multiplex RT-PCR and negative for GI.4 viruses by PCR. In contrast, in true negative



423 domestic animals that had never been exposed to known caliciviruses, fewer than 10 copies  
424 of viral RNA per mg liver tissue were detected, outside the range of the standard curve for  
425 the assay. For precise quantification of the respective strains, virus-specific Taqman qRT-  
426 PCR assays with virus-specific standards would be preferable (such as those reported  
427 previously (Gall *et al.*, 2007)). However, the assay described here is designed to be used in  
428 conjunction with the highly sensitive multiplex RT-PCR assay to ascertain whether GI  
429 lagoviruses were the likely cause of death in the animals tested, which is suggested by high  
430 viral loads. In this context, the low virus titres detected in wild lagomorphs, in combination  
431 with the lack of amplification in the multiplex RT-PCR assay, may indicate the presence of  
432 one or more as-yet uncharacterised benign lagoviruses present in Australian lagomorph  
433 populations, since the qRT-PCR assay was designed to be broadly reactive. Alternatively,  
434 the qRT-PCR assay may be detecting lagovirus RNA from animals recovering from a  
435 previous non-fatal lagovirus infection, since non-infectious GI.1 RNA has been shown to be  
436 detectable for at least 15 weeks post-infection (Gall *et al.*, 2007). Previous studies from New  
437 Zealand have also demonstrated the detection of GI.1 RNA by nested RT-PCR in a large  
438 proportion of healthy shot wild rabbits (Zheng *et al.*, 2002, Forrester *et al.*, 2003). In the latter  
439 case, we would also expect a positive result by multiplex RT-PCR, since the sensitivity of  
440 that assay was determined to be  $1 \times 10^1$  capsid copies per  $\mu\text{l}$  of RNA template for each virus  
441 strain (Figure 3). However, sensitivity testing was performed using serial dilutions of a high  
442 titre sample and the proportion of viral RNA to host RNA would be lower in a low titre sample  
443 compared to a diluted high titre sample, which may also affect the assay sensitivity.

444 It is notable that our qRT-PCR assay was also able to detect GI.4 benign virus RNA in  
445 duodenal samples, demonstrating the utility of this assay to detect genetically diverse GI  
446 lagoviruses. Virus loads during GI.4 infection ( $\bar{x}_g = 1 \times 10^4$  capsid copies per mg of tissue)  
447 were considerably lower than those detected for infection with pathogenic lagoviruses, as  
448 reported previously (Strive *et al.*, 2010).

449           Alternative diagnostic methods, such as high-throughput sequencing technologies,  
450   have also been developed and utilised for analyses of lagoviruses in the Australian context  
451   (Eden *et al.*, 2015, Hall *et al.*, 2015, Mahar *et al.*, 2016). However, despite recent advances  
452   these technologies remain complex, with regards to both sample preparation and data  
453   analysis, and are more expensive and slower than conventional diagnostic testing.  
454   Furthermore, the risk of contamination during preparation of sequencing libraries is  
455   extremely high, the diagnostic significance of low numbers of reads is questionable, and  
456   mixed infections are not reliably detected (R. Hall and J. Mahar, unpublished data). The  
457   assays described here, despite their limitations, constitute a fast, robust, and cost-effective  
458   diagnostic pipeline for routine rabbit GI lagovirus testing, where fast turnaround of results is  
459   required.

460           Using the newly developed multiplex RT-PCR assay and qRT-PCR assay, we  
461   detected 36 cases of infection with a novel recombinant virus, which had the non-structural  
462   genes of GI.1a-Aus and the structural genes of GI.2. These cases were detected in NSW,  
463   the ACT, and Victoria between July 2016 and June 2017 (Table 4, Figure 5) and confirmed  
464   by Sanger sequencing over the RdRp-VP60 junction. The detection of this recombinant was  
465   only possible because the primer binding sites for GI.1a-Aus lie within the RdRp gene while  
466   those for GI.2 lie within the VP60 region. Accordingly, the multiplex assay reported here will  
467   not be able to detect GI.1c/GI.2 recombinants or GI.1a-Aus/GI.1a-K5 recombinants, due to  
468   the relative location of the primer binding sites for these assays (Figure 1). High throughput  
469   sequencing methods spanning the RdRp-VP60 junction region may facilitate rapid detection  
470   of intergenic recombination between any rabbit lagoviruses.

471           Although sampling of dead rabbits is not systematic, it seems clear that this  
472   recombinant has already spread further than the parental GI.1a-Aus virus. It is likely that this  
473   recombinant virus will have similar immunological characteristics to GI.2, however,  
474   experimental determination of relative virulence and transmissibility have not yet been  
475   determined. This immunological similarity is supported by the detection of this recombinant

476 virus in a domestic rabbit that had been vaccinated against GI.1 strains approximately four  
477 months prior to infection. Interestingly, this recombinant variant was also detected in a hare,  
478 suggesting that the GI.2 capsid protein is responsible for permissivity of hare cells to  
479 infection. This once again highlights the importance of recombination for generating genetic  
480 diversity in caliciviruses and indicates the frequency with which new viruses can emerge  
481 when genetically diverse lagoviruses circulate concurrently. The discovery of this new  
482 recombinant virus emphasises the importance of maintaining monitoring efforts to remain  
483 informed about the way lagoviruses are evolving and interacting within Australia.

484 We report an improved diagnostic testing method for rapid detection and discrimination  
485 of pathogenic rabbit lagoviruses in the Australian context. The multiplex RT-PCR described  
486 here is a sensitive and specific assay that can rapidly diagnose infection with pathogenic  
487 lagoviruses and discriminate between GI.1c, GI.2, GI.1a-Aus, and GI.1a-K5 viruses.  
488 Additionally, we report a SYBR-green based qRT-PCR assay that broadly detects all of the  
489 known rabbit GI lagoviruses present in Australia and permits quantification of virus load in  
490 tissue samples. The development of these assays facilitates rapid detection, identification,  
491 and quantification of these viruses in a high throughput and cost-effective method. Since  
492 both assays are one-step RT-PCRs, there is no requirement for a separate cDNA synthesis  
493 step, reducing sample processing time and cost. These assays represent useful tools for  
494 ongoing large-scale nationwide monitoring of the spread and effectiveness of the GI.1a-K5  
495 virus after its release in 2017, which will assist in guiding wild rabbit biocontrol programs into  
496 the future.

497

## 498 **Acknowledgements**

499 We thank submitters and the Rabbitscan monitoring network for providing the samples  
500 utilised in this study. The assistance of technical staff of the EMAI virology laboratory is  
501 greatly appreciated. Funding for this work was obtained from CSIRO and the Invasive

502 Animals Cooperative Research Centre. J.E.M. is supported by grant DP140103362 from the  
503 Australian Research Council.

504

#### 505 **Conflict of Interest Statement**

506 The authors declare that they have no competing interests.

507

#### 508 **References**

- 509 Abrantes, J., W. van der Loo, J. Le Pendu and P. J. Esteves, 2012: Rabbit haemorrhagic  
510 disease (RHD) and rabbit haemorrhagic disease virus (RHDV): a review. *Veterinary*  
511 *Research*, 43, 12. doi: 10.1186/1297-9716-43-12
- 512 Bull, R. A., M. M. Tanaka and P. A. White, 2007: Norovirus recombination. *Journal of*  
513 *General Virology*, 88, 3347-3359. doi: 10.1099/vir.0.83321-0
- 514 Capucci, L., F. Fallacara, S. Grazioli, A. Lavazza, M. L. Pacciarini and E. Brocchi, 1998: A  
515 further step in the evolution of rabbit hemorrhagic disease virus: the appearance of  
516 the first consistent antigenic variant. *Virus Research*, 58, 115-126. doi:  
517 10.1016/S0168-1702(98)00106-3
- 518 Capucci, L., P. Fusi, A. Lavazza, M. L. Pacciarini and C. Rossi, 1996: Detection and  
519 preliminary characterization of a new rabbit calicivirus related to rabbit hemorrhagic  
520 disease virus but nonpathogenic. *Journal of Virology*, 70, 8614-8623. doi: not  
521 available
- 522 Cooke, B. D. and F. Fenner, 2002: Rabbit haemorrhagic disease and the biological control of  
523 wild rabbits, *Oryctolagus cuniculus*, in Australia and New Zealand. *Wildlife Research*,  
524 29, 689-706. doi: 10.1071/WR02010
- 525 Cox, T. E., T. Strive, G. Mutze, P. West and G. Saunders, 2013: Benefits of rabbit biocontrol  
526 in Australia. PestSmart Toolkit publication, Invasive Animals Cooperative Research  
527 Centre, Canberra, Australia.
- 528 Dalton, K. P., I. Nicieza, A. Balseiro, M. A. Muguerza, J. M. Rosell, R. Casais, Á. L. Álvarez  
529 and F. Parra, 2012: Variant rabbit hemorrhagic disease virus in young rabbits, Spain.  
530 *Emerging Infectious Diseases*, 18, 2009-2012. doi: 10.3201/eid1812.120341
- 531 Eden, J.-S., J. Kovaliski, J. A. Duckworth, G. Swain, J. E. Mahar, T. Strive and E. C. Holmes,  
532 2015: Comparative phylodynamics of rabbit haemorrhagic disease virus (RHDV) in  
533 Australia and New Zealand. *Journal of Virology*. doi: 10.1128/JVI.01100-15

- 534 Elsworth, P., B. D. Cooke, J. Kovaliski, R. Sinclair, E. C. Holmes and T. Strive, 2014:  
535 Increased virulence of rabbit haemorrhagic disease virus associated with genetic  
536 resistance in wild Australian rabbits (*Oryctolagus cuniculus*). *Virology*, 464-465, 415-  
537 423. doi: 10.1016/j.virol.2014.06.037
- 538 Forrester, N. L., B. Boag, S. R. Moss, S. L. Turner, R. C. Trout, P. J. White, P. J. Hudson  
539 and E. A. Gould, 2003: Long-term survival of New Zealand rabbit haemorrhagic  
540 disease virus RNA in wild rabbits, revealed by RT-PCR and phylogenetic analysis.  
541 *Journal of General Virology*, 84, 3079-3086. doi: 10.1099/vir.0.19213-0
- 542 Forrester, N. L., S. R. Moss, S. L. Turner, H. Schirrmeyer and E. A. Gould, 2008:  
543 Recombination in rabbit haemorrhagic disease virus: possible impact on evolution  
544 and epidemiology. *Virology*, 376, 390-396. doi: 10.1016/j.virol.2008.03.023
- 545 Forrester, N. L., R. C. Trout and E. A. Gould, 2007: Benign circulation of rabbit haemorrhagic  
546 disease virus on Lambay Island, Eire. *Virology*, 358, 18-22. doi:  
547 10.1016/j.virol.2006.09.011
- 548 Gall, A., B. Hoffmann, J. P. Teifke, B. Lange and H. Schirrmeyer, 2007: Persistence of viral  
549 RNA in rabbits which overcome an experimental RHDV infection detected by a highly  
550 sensitive multiplex real-time RT-PCR. *Veterinary Microbiology*, 120, 17-32. doi:  
551 10.1016/j.vetmic.2006.10.006
- 552 Hall, R. N., L. Capucci, M. Matthaei, S. Esposito, P. J. Kerr, M. Frese and T. Strive, 2017: An  
553 *in vivo* system for directed experimental evolution of rabbit haemorrhagic disease  
554 virus. *PLOS ONE*, 12, e0173727. doi: 10.1371/journal.pone.0173727
- 555 Hall, R. N., J. E. Mahar, S. Haboury, V. Stevens, E. C. Holmes and T. Strive, 2015:  
556 Emerging rabbit hemorrhagic disease virus 2 (RHDVb), Australia. *Emerging*  
557 *Infectious Diseases*, 21, 2276-2278. doi: 10.3201/eid2112.151210
- 558 Hoehn, M., P. J. Kerr and T. Strive, 2013: *In situ* hybridisation assay for localisation of rabbit  
559 calicivirus Australia-1 (RCV-A1) in European rabbit (*Oryctolagus cuniculus*) tissues.  
560 *Journal of Virological Methods*, 188, 148-152. doi: 10.1016/j.jviromet.2012.11.043
- 561 Kearse, M., R. Moir, A. Wilson, S. Stones-Havas, M. Cheung, S. Sturrock, S. Buxton, A.  
562 Cooper, S. Markowitz, C. Duran, T. Thierer, B. Ashton, P. Meintjes and A.  
563 Drummond, 2012: Geneious Basic: an integrated and extendable desktop software  
564 platform for the organization and analysis of sequence data. *Bioinformatics*, 28,  
565 1647-1649. doi: 10.1093/bioinformatics/bts199
- 566 Kovaliski, J., R. Sinclair, G. Mutze, D. Peacock, T. Strive, J. Abrantes, P. J. Esteves and E.  
567 C. Holmes, 2014: Molecular epidemiology of rabbit haemorrhagic disease virus in  
568 Australia: when one became many. *Molecular Ecology*, 23, 408-420. doi:  
569 10.1111/mec.12596

- 570 Lavazza, A. and L. Capucci, 2016: Rabbit haemorrhagic disease. *OIE Manual of Diagnostic*  
571 *Tests and Vaccines for Terrestrial Animals*.  
572 [http://www.oie.int/fileadmin/Home/eng/Health\\_standards/tahm/2.06.02\\_RHD.pdf](http://www.oie.int/fileadmin/Home/eng/Health_standards/tahm/2.06.02_RHD.pdf).
- 573 Le Gall-Recule, G., A. Lavazza, S. Marchandeau, S. Bertagnoli, F. Zwingelstein, P.  
574 Cavadini, N. Martinelli, G. Lombardi, J. L. Guerin, E. Lemaitre, A. Decors, S.  
575 Boucher, B. Le Normand and L. Capucci, 2013: Emergence of a new lagovirus  
576 related to Rabbit haemorrhagic disease virus. *Veterinary research*, 44, 81. doi:  
577 10.1186/1297-9716-44-81
- 578 Le Gall-Recule, G., F. Zwingelstein, S. Boucher, B. Le Normand, G. Plassiart, Y. Portejoie,  
579 A. Decors, S. Bertagnoli, J. L. Guerin and S. Marchandeau, 2011a: Detection of a  
580 new variant of rabbit haemorrhagic disease virus in France. *Veterinary record*, 168,  
581 137-138. doi: 10.1136/vr.d697
- 582 Le Gall-Recule, G., F. Zwingelstein, M. P. Fages, S. Bertagnoli, J. Gelfi, J. Aubineau, A.  
583 Roobrouck, G. Botti, A. Lavazza and S. Marchandeau, 2011b: Characterisation of a  
584 non-pathogenic and non-protective infectious rabbit lagovirus related to RHDV.  
585 *Virology*, 410, 395-402. doi: 10.1016/j.virol.2010.12.001
- 586 Le Gall-Recule, G., F. Zwingelstein, S. Laurent, C. de Boisseson, Y. Portejoie and D.  
587 Rasschaert, 2003: Phylogenetic analysis of rabbit haemorrhagic disease virus in  
588 France between 1993 and 2000, and the characterisation of RHDV antigenic  
589 variants. *Archives of Virology*, 148, 65-81. doi: 10.1016/j.virol.2005.10.006
- 590 Le Pendu, J., J. Abrantes, S. Bertagnoli, J. S. Guitton, G. Le Gall-Recule, A. M. Lopes, S.  
591 Marchandeau, F. Alda, T. Almeida, A. P. Célio, J. Bárcena, G. Burkmakina, E.  
592 Blanco, C. Calvete, P. Cavadini, B. D. Cooke, K. P. Dalton, M. D. Mateos, W.  
593 Deptula, J. S. Eden, F. Wang, C. C. Ferreira, P. Ferreira, P. Foronda, D. Gonçalves,  
594 D. Gavier-Widen, R. N. Hall, B. Hukowska-Szematowicz, P. J. Kerr, J. Kovaliski, A.  
595 Lavazza, J. E. Mahar, A. Malogolovkin, R. M. Marques, S. Marques, A. Martin-  
596 Alonso, P. Monterroso, G. Mutze, A. Neimanis, P. Niedzwiedzka-Rystwej, D.  
597 Peacock, F. Parra, M. Rocchi, C. Rouco, N. Ruvoën-Clouet, E. Silva, D. Silvério, T.  
598 Strive, G. Thompson, B. Tokarz-Deptula, P. J. Esteves and S. Moreno, 2017:  
599 Proposal for a unified classification system and nomenclature of lagoviruses. *Journal*  
600 *of General Virology*, in press. doi:
- 601 Liu, J., P. J. Kerr and T. Strive, 2012a: A sensitive and specific blocking ELISA for the  
602 detection of rabbit calicivirus RCV-A1 antibodies. *Virology Journal*, 9, 182. doi:  
603 10.1186/1743-422X-9-182
- 604 Liu, J., P. J. Kerr, J. D. Wright and T. Strive, 2012b: Serological assays to discriminate rabbit  
605 haemorrhagic disease virus from Australian non-pathogenic rabbit calicivirus.  
606 *Veterinary Microbiology*, 157, 345-354. doi: 10.1016/j.vetmic.2012.01.018

- 607 Liu, S. J., H. P. Xue, B. Q. Pu and N. H. Qian, 1984: A new viral disease in rabbits. *Journal*  
608 *of Veterinary Diagnostic Investigations*, 16, 253-255. doi: not available
- 609 Lopes, A. M., K. P. Dalton, M. J. Magalhaes, F. Parra, P. J. Esteves, E. C. Holmes and J.  
610 Abrantes, 2015: Full genomic analysis of new variant rabbit hemorrhagic disease  
611 virus (RHDVb) revealed multiple recombination events. *Journal of General Virology*,  
612 96, 1309-1319. doi: 10.1099/vir.0.000070
- 613 Mahar, J. E., L. Nicholson, J. S. Eden, S. Duchene, P. J. Kerr, J. Duckworth, V. K. Ward, E.  
614 C. Holmes and T. Strive, 2016: Benign rabbit caliciviruses exhibit evolutionary  
615 dynamics similar to those of their virulent relatives. *Journal of Virology*, 90, 9317-  
616 9329. doi: 10.1128/JVI.01212-16
- 617 Martin, D. P., B. Murrell, M. Golden, A. Khoosal and B. Muhire, 2015: RDP4: Detection and  
618 analysis of recombination patterns in virus genomes. *Virus Evolution*. doi:  
619 10.1093/ve/vev003
- 620 Martín , I., T. García, V. Fajardo, M. Rojas, N. Pegels, P. E. Hernández, I. González and R.  
621 Martín 2009: Polymerase chain reaction detection of rabbit DNA in food and animal  
622 feed. *World Rabbit Science*, 17, 27-34. doi: 10.4995/wrs.2009.667
- 623 Meyers, G., C. Wirblich and H. J. Thiel, 1991: Genomic and subgenomic RNAs of rabbit  
624 hemorrhagic disease virus are both protein-linked and packaged into particles.  
625 *Virology*, 184, 677-686. doi: 10.1016/0042-6822(91)90437-G
- 626 Oem, J. K., K. N. Lee, I. S. Roh, K. K. Lee, S. H. Kim, H. R. Kim, C. K. Park and Y. S. Joo,  
627 2009: Identification and characterization of rabbit hemorrhagic disease virus genetic  
628 variants isolated in Korea. *Journal of Veterinary Medical Science*, 71, 1519-1523. doi:  
629 10.1292/jvms.001519
- 630 Ohlinger, V. F., B. Haas, G. Meyers, F. Weiland and H. J. Thiel, 1990: Identification and  
631 characterization of the virus causing rabbit hemorrhagic disease. *Journal of Virology*,  
632 64, 3331-3336. doi: not available
- 633 OIE, 2014: Rabbit haemorrhagic disease, Australia - immediate notification report Ref  
634 OIE = 14719.
- 635 OIE, 2017: Rabbit haemorrhagic disease, Australia - immediate notification report Ref  
636 OIE = 23377.
- 637 Schirmeier, H., I. Reimann, B. Kollner and H. Granzow, 1999: Pathogenic, antigenic and  
638 molecular properties of rabbit haemorrhagic disease virus (RHDV) isolated from  
639 vaccinated rabbits: detection and characterization of antigenic variants. *Archives of*  
640 *Virology*, 144, 719-735. doi: not available
- 641 Strive, T., J. Wright, J. Kovaliski, G. Botti and L. Capucci, 2010: The non-pathogenic  
642 Australian lagovirus RCV-A1 causes a prolonged infection and elicits partial cross-

643 protection to rabbit haemorrhagic disease virus. *Virology*, 398, 125-134. doi:  
 644 10.1016/j.virol.2009.11.045  
 645 Strive, T., J. D. Wright and A. J. Robinson, 2009: Identification and partial characterisation of  
 646 a new Lagovirus in Australian wild rabbits. *Virology*, 384, 97-105. doi:  
 647 10.1016/j.virol.2008.11.004  
 648 Urakova, N., M. Frese, R. N. Hall, J. Liu, M. Matthaei and T. Strive, 2015: Expression and  
 649 partial characterisation of rabbit haemorrhagic disease virus non-structural proteins.  
 650 *Virology*, 484, 69-79. doi: 10.1016/j.virol.2015.05.004  
 651 Zheng, T., A. M. Napier, J. P. Parkes, J. S. O'Keefe and P. H. Atkinson, 2002: Detection of  
 652 RNA of rabbit haemorrhagic disease virus from New Zealand wild rabbits. *Wildlife*  
 653 *Research*, 29, 683-688. doi: 10.1071/WR01071

654

655 **Table 1.** Primer sequences for the lagovirus multiplex RT-PCR assay.

| Primer name   | Sequence (5'→3')               | Amplicon size (bp) | Nucleotide position <sup>†</sup> | Gene <sup>‡</sup> |
|---------------|--------------------------------|--------------------|----------------------------------|-------------------|
| Gl.1a-Aus_fwd | GCGTGGCATTGTGCGCA<br>GCATC     | 562                | 4349                             | RdRp              |
| Gl.1a-Aus_rev | TGTTGGTGATAAGCCATA<br>ATCGCG   |                    | 4911                             |                   |
| Gl.1c_fwd     | AGCAAGACTGTTGACTCA<br>ATTTTCG  | 435                | 5995                             | VP60              |
| Gl.1c_rev     | AGGCCTGCACAGTCGTA<br>ACGTT     |                    | 6430                             |                   |
| Gl.2_fwd      | TTTCCCTGGAAGCAGTTC<br>GTCA     | 336                | 6213                             | VP60              |
| Gl.2_rev      | TGTTGTCTGGTTTATGCC<br>ATTTGC   |                    | 6549                             |                   |
| Gl.1a-K5_fwd  | TTTATAGATGTATGCCCG<br>CTCAAC   | 263                | 4930                             | RdRp              |
| Gl.1a-K5_rev  | CCGTTTCGAGTTCCTTGC<br>GGACG    |                    | 5193                             |                   |
| 12SpRab-F     | CAAAAGTAAGCTCAATTA<br>CCACCGTA | 110                | n/a                              | n/a               |
| 12SpRab-R     | ATAAGGGCTTTCGTATAT<br>TCGGAA   |                    | n/a                              |                   |

656 <sup>†</sup>Nucleotide positions are based on Genbank accession KT280060.



657 †RdRp: RNA-dependent RNA polymerase coding region; VP60: VP60 capsid protein coding  
658 region (Figure 1).

659

660 **Table 2.** Primer sequences for the lagovirus qRT-PCR assay.

| Primer name  | Sequence (5'→3')               | Amplicon size (bp) | Nucleotide position |
|--------------|--------------------------------|--------------------|---------------------|
| GI_qRTPCR_Fw | TTGACRTACGCCCTGTG<br>GGACC     | 89                 | 6956                |
| GI_qRTPCR_Rv | TCAGACATAAGARAAGCC<br>ATTRGYTG |                    | 7044                |

661 †Nucleotide positions are based on Genbank accession KT280060.

662

663 **Table 3.** Validation of the multiplex RT-PCR assay.

| EMAI genotype               | Multiplex RT-PCR genotype |                 |           |          |          | Total No. tested |
|-----------------------------|---------------------------|-----------------|-----------|----------|----------|------------------|
|                             | GI.1c                     | GI.2            | GI.1a-Aus | GI.1a-K5 | Negative |                  |
| <b>GI.1c</b>                | 5                         | 0               | 0         | 0        | 1        | 6                |
| <b>GI.2</b>                 | 0                         | 50 <sup>‡</sup> | 0         | 0        | 1        | 51               |
| <b>GI.1a-Aus</b>            | 0                         | 0               | 21        | 0        | 0        | 21               |
| <b>GI.1a-K5</b>             | 0                         | 0               | 0         | 1        | 0        | 1                |
| <b>Negative<sup>†</sup></b> | 0                         | 1 <sup>§</sup>  | 0         | 0        | 11       | 12               |

664 †Negative samples were collected from rabbits from a known lagovirus-free breeding colony.

665 ‡One sample produced both a GI.2 and GI.1a-Aus band in multiplex RT-PCR. This was  
666 subsequently confirmed to be a novel recombinant variant.

667 §This sample produced a very weak non-specific amplification product approximately the  
668 size of the GI.2 amplicon despite being collected in 2011, prior to the incursion of GI.2 into  
669 Australia.

670 Grey shading indicates correct identification by the multiplex RT-PCR assay.

671

672 **Table 4.** GI.1a-AusP/GI.2 recombinant detections, July 2016 to June 2017.

| <b>Case no. †</b> | <b>Isolate name</b> | <b>Collection date</b> | <b>Location, state‡</b> | <b>Animal use §</b> |
|-------------------|---------------------|------------------------|-------------------------|---------------------|
| 1                 | AUS/NSW/TUB-1       | 13/07/2016             | Tubbul, NSW             | W                   |
| 2                 | AUS/NSW/CAR-2       | 7/10/2016              | Carwoola, NSW           | W                   |
| 3                 | AUS/NSW/CAR-3       | 10/10/2016             | Carwoola, NSW           | W                   |
| 4                 | AUS/ACT/GGH-1       | 20/11/2016             | Gungahlin, ACT          | U                   |
| 5                 | AUS/NSW/MCH-1       | 1/01/2017              | Michelago, NSW          | U                   |
| 6                 | AUS/NSW/MCH-2       | 2/01/2017              | Michelago, NSW          | U                   |
| 7                 | AUS/NSW/CAR-7       | 17/03/2017             | Carwoola, NSW           | W                   |
| 8                 | AUS/NSW/CAR-8       | 17/03/2017             | Carwoola, NSW           | W                   |
| 9                 | AUS/NSW/CAR-9       | 20/03/2017             | Carwoola, NSW           | W                   |
| 10                | AUS/NSW/CAR-10      | 23/03/2017             | Carwoola, NSW           | W                   |
| 11                | AUS/NSW/CAR-11      | 23/03/2017             | Carwoola, NSW           | W                   |
| 12                | AUS/NSW/CAR-13      | 25/03/2017             | Carwoola, NSW           | W                   |
| 13                | AUS/NSW/CAR-14      | 26/03/2017             | Carwoola, NSW           | W                   |
| 14                | AUS/NSW/CAR-12      | 28/03/2017             | Carwoola, NSW           | W                   |
| 15                | AUS/NSW/CAR-17      | 28/03/2017             | Carwoola, NSW           | W                   |
| 16                | AUS/NSW/CAR-16      | 29/03/2017             | Carwoola, NSW           | W                   |
| 17                | AUS/NSW/CAR-15      | 31/03/2017             | Carwoola, NSW           | W                   |
| 18                | AUS/NSW/MND-1       | 10/04/2017             | Mandurama, NSW          | W                   |
| 19                | AUS/NSW/MCH-3       | 13/04/2017             | Michelago, NSW          | U                   |
| 20                | AUS/NSW/BYW-1       | 14/04/2017             | Bywong, NSW             | U                   |
| 21                | AUS/ACT/HACK-3      | 15/04/2017             | Hackett, ACT            | W                   |
| 22                | AUS/ACT/GUD-302     | 19/04/2017             | Symonston, ACT          | W                   |
| 23                | AUS/NSW/BG-14       | 22/04/2017             | Murrumbateman, NSW      | W                   |

|           |               |            |                      |    |
|-----------|---------------|------------|----------------------|----|
| <b>24</b> | AUS/NSW/BG-15 | 25/04/2017 | Murrumbateman, NSW   | W  |
| <b>25</b> | AUS/NSW/BG-16 | 25/04/2017 | Murrumbateman, NSW   | W  |
| <b>26</b> | AUS/NSW/BG-17 | 25/04/2017 | Murrumbateman, NSW   | W  |
| <b>27</b> | AUS/ACT/AIN-5 | 27/04/2017 | Mt Ainslie, ACT      | W  |
| <b>28</b> | AUS/NSW/CAD-1 | 28/04/2017 | Camden, NSW          | D  |
| <b>29</b> | AUS/NSW/BG-18 | 30/04/2017 | Murrumbateman, NSW   | W  |
| <b>30</b> | AUS/NSW/BG-19 | 30/04/2017 | Murrumbateman, NSW   | W  |
| <b>31</b> | AUS/NSW/BG-20 | 30/04/2017 | Murrumbateman, NSW   | W  |
| <b>32</b> | AUS/NSW/BG-21 | 5/05/2017  | Murrumbateman, NSW   | W  |
| <b>33</b> | AUS/NSW/MCH-4 | 17/05/2017 | Michelago, NSW       | W  |
| <b>34</b> | AUS/VIC/KIL-1 | 27/05/2017 | Kilmore, VIC         | W  |
| <b>35</b> | AUS/NSW/HRP-1 | 29/05/2017 | Harrington Park, NSW | DV |
| <b>36</b> | AUS/NSW/MUR-6 | 25/06/2017 | Murrumbateman, NSW   | H  |

673 † Samples are numbered according to the date on which they were collected. These  
674 numbers correspond to those used on the map in Figure 6.

675 ‡Abbreviations for Australian states and territories are as follows: ACT, Australian Capital  
676 Territory; NSW, New South Wales; VIC, Victoria.

677 §W, wild rabbit; U, animal use not specified; D, domestic rabbit; DV, domestic rabbit  
678 vaccinated with Cylap® RCD vaccine (Zoetis, West Ryde, NSW); H, hare.

679

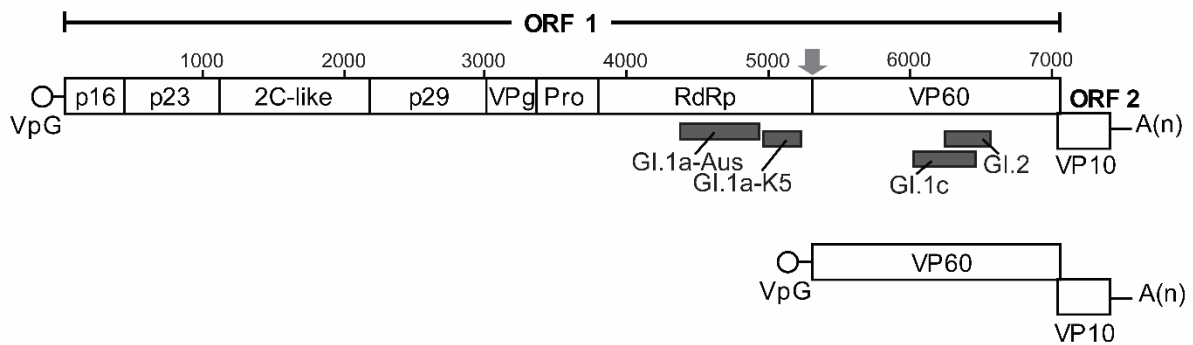

680

681 **Figure 1: Genomic organisation of lagoviruses and location of multiplex RT-PCR**

682 **amplicons.** Lagoviruses have a single-stranded positive-sense RNA genome (top)

683 approximately 7.5 kb in length comprising two open reading frames (ORFs; open boxes,

684 labelled in bold). The ORF1 polyprotein is cleaved into seven non-structural proteins: p16,

685 p23, 2C-like protein, p29, the viral genome-linked protein (VPg), the viral protease (Pro), the

686 RNA-dependent RNA polymerase (RdRp), and the major capsid protein VP60. ORF2

687 encodes a minor structural protein, VP10. A subgenomic RNA (bottom) is also produced that

688 is approximately 2.2 kb in length and encodes both structural proteins, VP60 and VP10. Both

689 the genomic and subgenomic RNAs are polyadenylated at the 3' end, and linked to VPg at

690 the 5' end. Recombination is frequently observed at the RdRp-VP60 junction (grey arrow).

691 The regions amplified in the multiplex RT-PCR assay are shown (dark grey boxes) for Gl.1a-

692 Aus, Gl.1a-K5, Gl.1c, and Gl.2 lagoviruses.

693

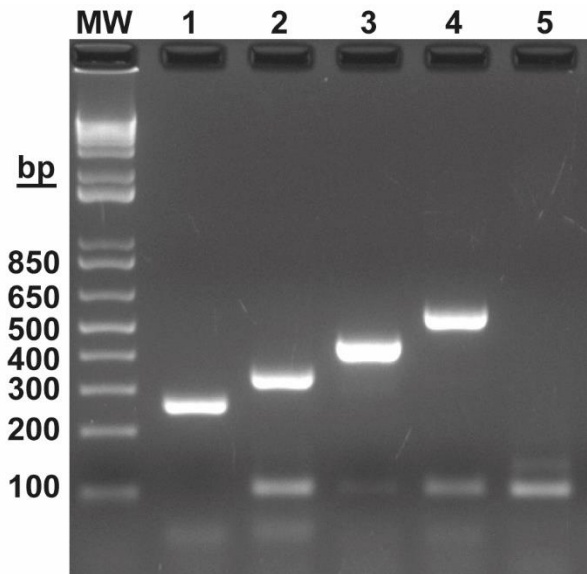

694

695 **Figure 2: Multiplex RT-PCR for the differentiation of pathogenic GI lagoviruses in**  
696 **Australia.** RNA was isolated from tissues of rabbits with suspected GI lagovirus infections  
697 and multiplex RT-PCR was performed to discriminate between GI.1a-K5 (1), GI.2 (2), GI.1c  
698 (3), and GI.1a-Aus (4). MW, 1 Kb Plus DNA ladder (Life Technologies, Scoresby, VIC); 5,  
699 lagovirus-negative rabbit liver; 6, no template control. A 110 bp fragment of rabbit host RNA  
700 was also amplified to confirm that RNA isolation was successful. Note that GI.1a-K5 RNA  
701 was prepared from a purified virus preparation and thus no rabbit amplicon is present.

702

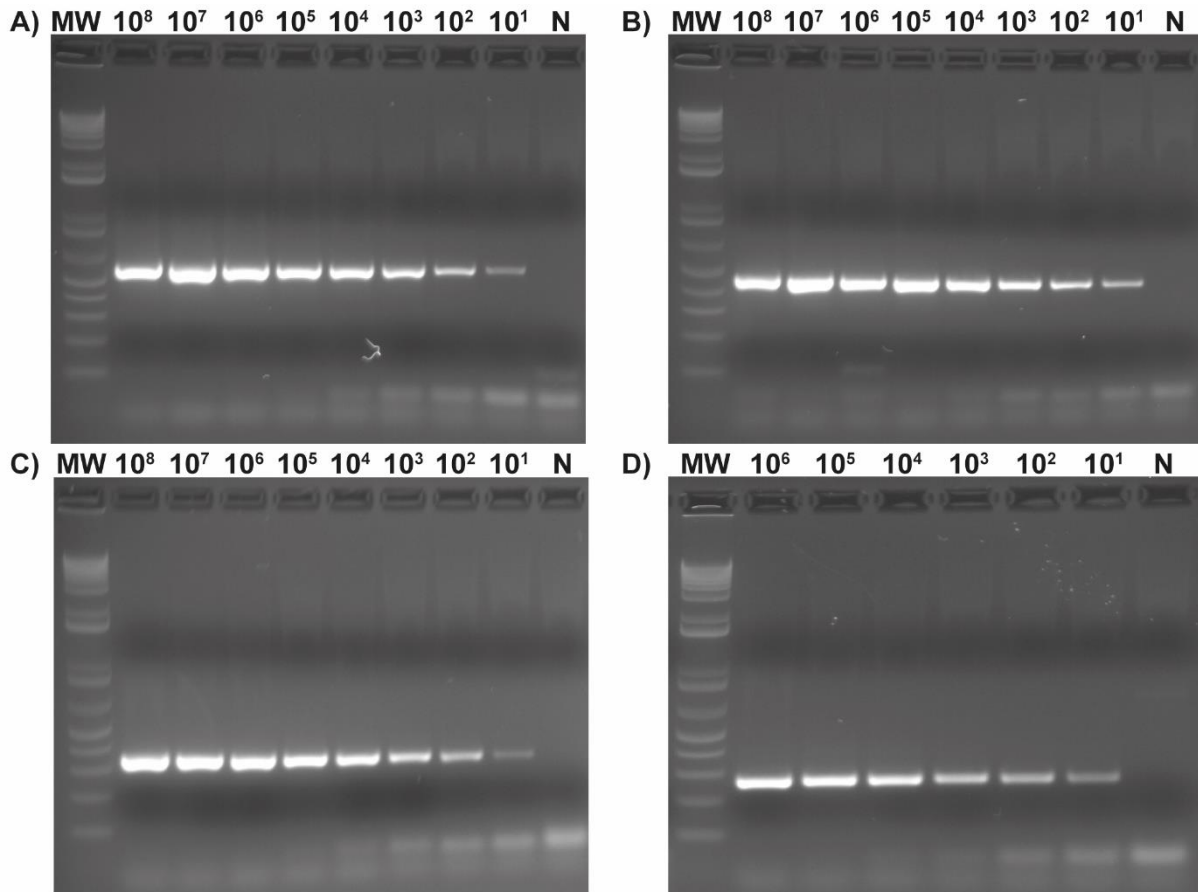

703

704 **Figure 3: Sensitivity testing of the multiplex RT-PCR assay.** Sensitivity was determined  
705 using 10-fold serial dilutions ranging from  $1 \times 10^8$  capsid copies ( $1 \times 10^6$  for GI.1a-K5) to  $1 \times 10^1$   
706 capsid copies of a representative virus of a) GI.1a-Aus; b) GI.1c; c) GI.2; and d) GI.1a-K5.  
707 MW, 1 Kb Plus DNA ladder (Life Technologies, Scoresby, VIC); N, no template control.

708

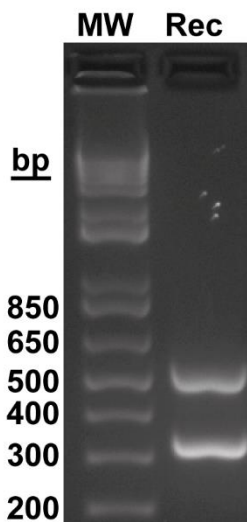

709

710 **Figure 4: Detection of a GI.1a-AusP/GI.2 recombinant.** Multiplex RT-PCR performed on  
711 RNA isolated from the liver of a rabbit suspected to have died from RHD produced  
712 amplicons for both GI.2 and GI.1a-Aus viruses, suggesting either a mixed infection or a  
713 possible recombinant virus.

714

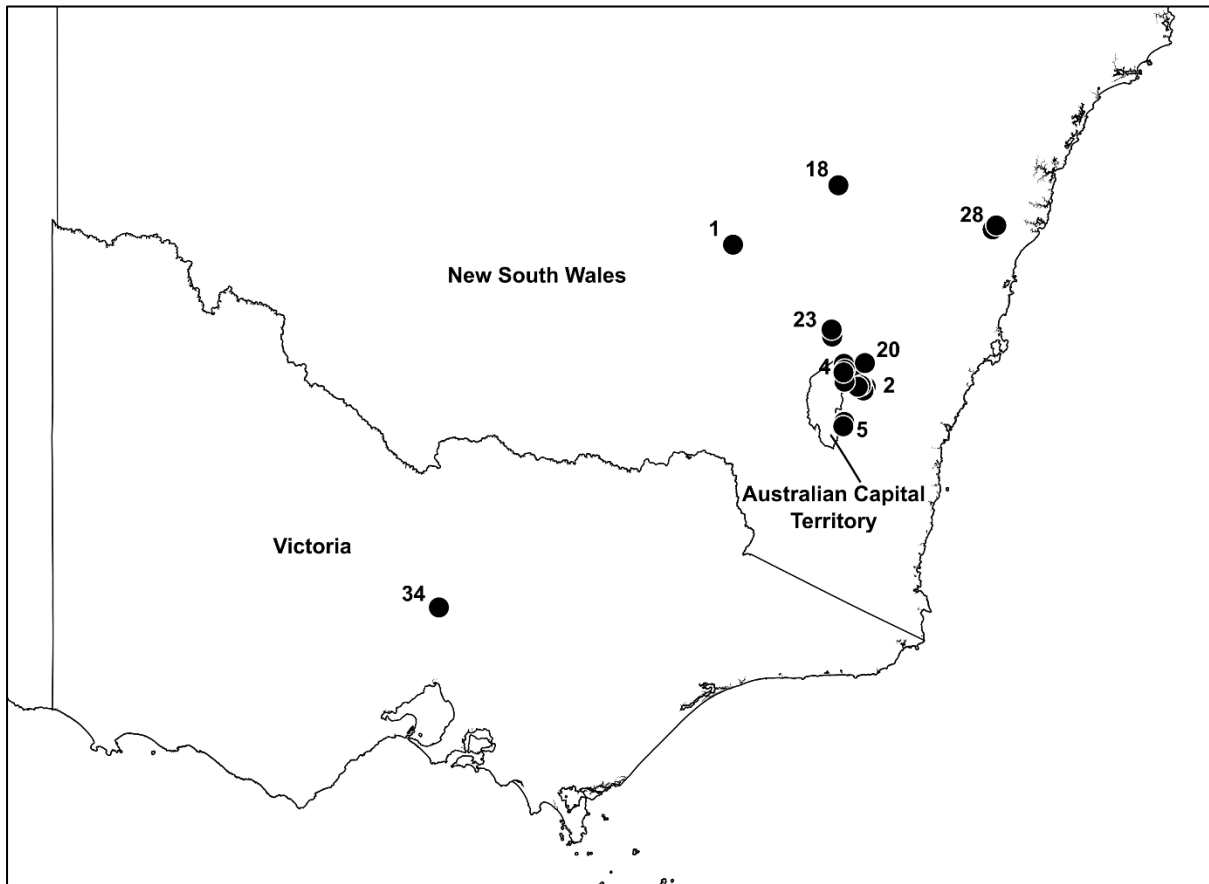

715

716 **Figure 5: Detections of the novel GI.1a-AusP/GI.2 recombinant in Australia between**  
717 **July 2016 and June 2017.** Sites where GI.1a-AusP/GI.2 cases were detected are indicated  
718 on the map and numbered according to the order in which the outbreaks occurred. Where  
719 multiple cases occurred in the same geographical location, only the first number is given.

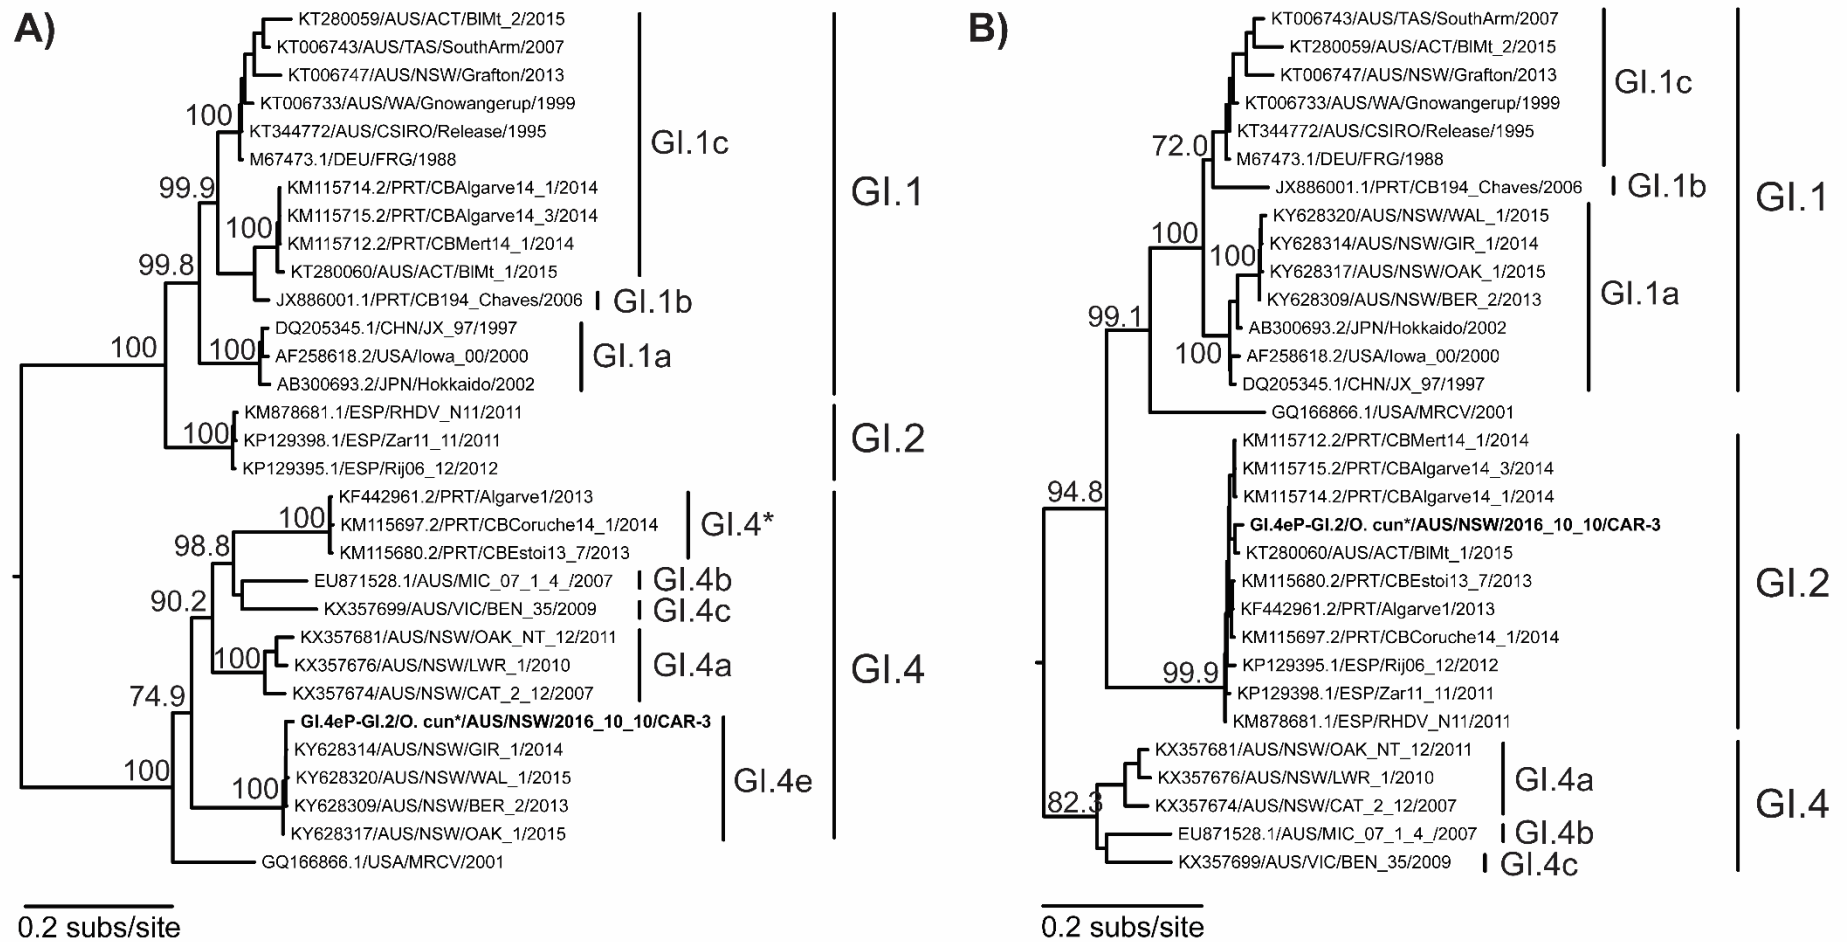

720

721 **Figure 6: Non-structural and structural gene phylogenies of representative lagoviruses.** Maximum likelihood phylogenies of the (A) non-  
 722 structural genes (n=31) and (B) structural genes (VP60 and VP10, n=31) were inferred using the newly sequenced GI.1a-AusP/GI.2  
 723 recombinant (shown in bold) and representative published sequences. The Genbank accession numbers of published sequences are indicated



724 in the taxa names. The genotype of each cluster is indicated. The clade marked with an asterisk has not been classified to the variant level.  
725 Phylogenies were rooted using an early European EBHSV isolate (not shown) and the scale bar is proportional to the number of nucleotide  
726 substitutions per site. Bootstrap support values are shown for the major nodes.
